# Supplementary material
Source: publisher figshare collection journal article supplement (https://gsajournals.figshare.com/ndownloader/files/24749930)
Supplement: Supplementary file 1 [file 24749930]

## Sheet: Sheet1
Table S4 Top ten genes for each of the targeted ontologies analyses.
Term	Chromosome	P	Symbol
Dopamin*	4	0.000132763	Gnb1
Dopamin*	17	0.000198066	Fpr-rs3
Dopamin*	17	0.000204078	Fpr2
Dopamin*	17	0.000353606	Fpr-rs4
Dopamin*	17	0.000353606	Fpr1
Dopamin*	17	0.000353606	Fpr3
Dopamin*	10	0.00281809	Adora2a
Dopamin*	19	0.0093341	Htr7
Dopamin*	11	0.0127772	Crhr1
Dopamin*	1	0.0136281	Gpr35
Serotonin	19	0.0093341	Htr7
Serotonin	6	0.0203325	Chrm2
Serotonin	17	0.043282	Btbd9
Serotonin	5	0.075022	Htr5a
Serotonin	5	0.0883228	Nos1
Serotonin	1	0.12358	Fcgr3
Serotonin	11	0.143927	P2rx1
Serotonin	11	0.148732	Itgb3
Serotonin	11	0.15323	Xbp1
Serotonin	11	0.196829	Ddc
Osteo*	3	3.76e-05	Noct
Osteo*	11	0.00307452	Nf1
Osteo*	14	0.00348531	Mmp14
Osteo*	6	0.00351908	Atp6v0a4
Osteo*	1	0.00860488	Prrx1
Osteo*	8	0.00933341	Inpp4b
Osteo*	5	0.0124443	Mepe
Osteo*	14	0.0149588	Tnfsf11
Osteo*	2	0.0171159	Ucma
Osteo*	2	0.01972	Src
Cardiac	16	7.25e-06	Myh11
Cardiac	5	3.16e-05	Tbx5
Cardiac	16	7.84e-05	Dlg1
Cardiac	4	0.000132763	Gnb1
Cardiac	6	0.000169465	Foxp1
Cardiac	5	0.000262656	Tbx3
Cardiac	11	0.000310837	Meis1
Cardiac	16	0.000740301	Pkp2
Cardiac	11	0.00262286	Adap2
Cardiac	11	0.00307452	Nf1
"Skeletal Muscle"	6	5.23e-06	Kel
"Skeletal Muscle"	6	0.000169465	Foxp1
"Skeletal Muscle"	11	0.00307452	Nf1
"Skeletal Muscle"	4	0.00874714	Dvl1
"Skeletal Muscle"	18	0.0146132	Megf10
"Skeletal Muscle"	6	0.0218542	Ptn
"Skeletal Muscle"	1	0.0274688	Pax3
"Skeletal Muscle"	4	0.0280941	Hivep3
"Skeletal Muscle"	11	0.0295866	Kcnj2
"Skeletal Muscle"	1	0.0309615	Prox1
Brain	9	1.92e-07	Sorl1
Brain	5	3.99e-05	Gak
Brain	16	0.000147517	Fbxo45
Brain	5	0.000262656	Tbx3
Brain	10	0.000442279	Bcr
Brain	12	0.00107698	Fntb
Brain	14	0.00179975	Mettl3
Brain	14	0.00228893	Chd8
Brain	11	0.00307452	Nf1
Brain	11	0.00398127	Cdk5r1
